# Supplementary material
Source: PubMed Central journal article supplement (PMC1224146)
Supplement: bj3800255add.pdf [file bj3800255add.pdf]

## Supplemental Data

**Fig.1. Molecular mass of DHMBP-1 determined by UV cross-linking and partial affinity purification.** (A) UV cross-linking. The nuclear extracts of embryo (Em) and SG were UV cross-linked with S1, and the complexes were separated by SDS-PAGE. The molecular marker is shown on the left. Two bands were observed, as indicated by the arrows on the right. After correction for bound oligonucleotide, the molecular mass for protein 1 is about 40 kDa, and for protein 2 is about 20 kDa. (B) DHMBP-1 binding activity of eluted fractions from DNA affinity column. Presence of DHMBP-1 in different fractions obtained by affinity column was checked using EMSA with labeled S1. N represents EMSA reaction with the loaded fraction, F represents the flow-through fraction, and the numbers on top represent the fractions eluted by different concentrations of KCl (0.1 to 2.0 M). (C) SDS/PAGE and silver staining of DHMBP-1 positive fraction. M represents the molecular mass markers. Lane 1 represents the nuclear extract purified by sephacryl S-300 column, and lane 2 represents the concentrated fraction from affinity column with high DHMBP-1 binding activity.

## **Fig.2. Sequence comparison between POU-M1, POU-M2 and Har-POU**

Comparison of the deduced amino acid sequence of POU-M2, POU-M1, and Har-POU cloned from *H. armigera*. Asterisks show the identical amino acids. The POU specific- and homeo-domains are underlined. The 28 amino acids (amino acid 109-136 of POU-M2) which are various between POU-M1 and POU-M2 are specified by shaded black if more than two amino acids are the same in one position.

**Fig.3. DHMBP-2 enhanced the binding of DHMBP-1.** (A) Probe S1 was incubated with increasing amounts ( $\mu\text{g}$ ) of nuclear protein extracts from SG of day 1 pupae. C, cytoplasm protein extract. (B) Probes S1, S7 and SC were incubated with 10  $\mu\text{g}$  nuclear protein extracts from SG of day 1 pupae. pro, probe.

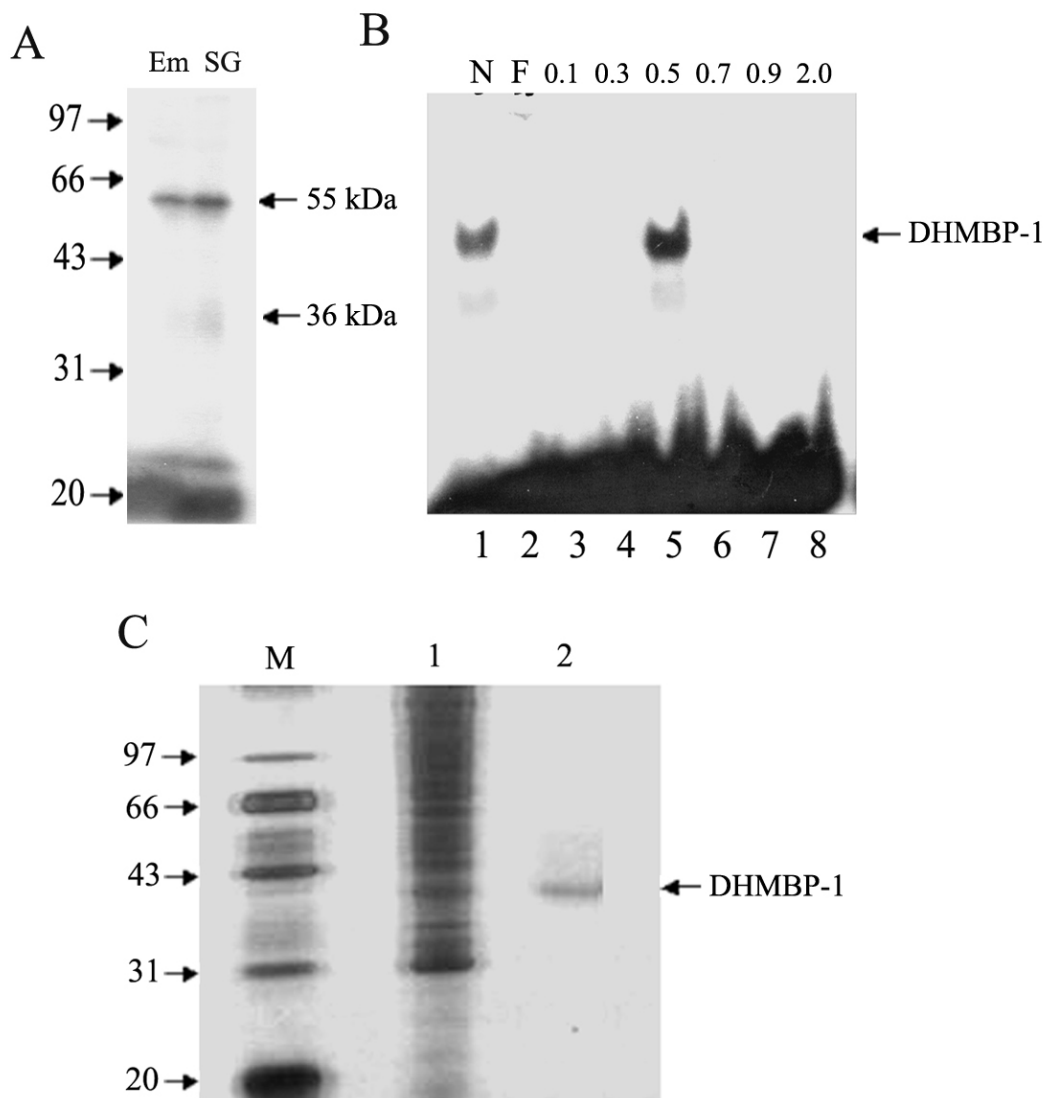

**Figure 1**

|         |                                                                  |     |
|---------|------------------------------------------------------------------|-----|
| Har-POU | MAATTYMPADMDLGD I GGYHAASPRSAEPADMKYQHGLHAGGSPSPGAPVL-NPWTSLPP   | 59  |
| POU-M2  | MAATTYMPAEMELGN I GGYHAASPRSAEPADMKYQHPLHSGGSPSPGAPV I GNPWTSLPP | 60  |
| POU-M1  | MAATTYMPAEMELGN I GGYHAASPRSAEPADMKYQHPLHSGGSPSPGAPV I GNPWTSLPP | 60  |
|         | ***** * ** *****                                                 |     |
| Har-POU | ADPWAMHQHHAHAHQPDVKPPPAPHEHRHLQHG--GWHAPVVS PHYGAGTPVALHGGYPM    | 117 |
| POU-M2  | ADPWAMHQHHAHAHAHQPDVKPPPAPHDHRHLQHAAGWHAPVVS PHYGAGSPVTLHGGYPM   | 120 |
| POU-M1  | ADPWAMHQHHAHAHAHQPDVKPPPAPHDHRHLQHAAGWHAPVVS PHYGAARPSHCMEDTQC   | 120 |
|         | ***** ***** *                                                    |     |
| Har-POU | PMHQHMLRD I QPSPHLHHHAMERPEEDTPTSDDLEAFKQFKQRR I KLGFTQADVG      | 177 |
| POU-M2  | PVHQHMLRD I QPSPHLHHHAMERDQPEEDTPTSDDLEAFKQFKQRR I KLGFTQADVG    | 180 |
| POU-M1  | PCTNT I CSETSSPR-DPLHHHAMERDQPEEDTPTSDDLEAFKQFKQRR I KLGFTQADVG  | 179 |
|         | * * *****                                                        |     |

**Figure 2**

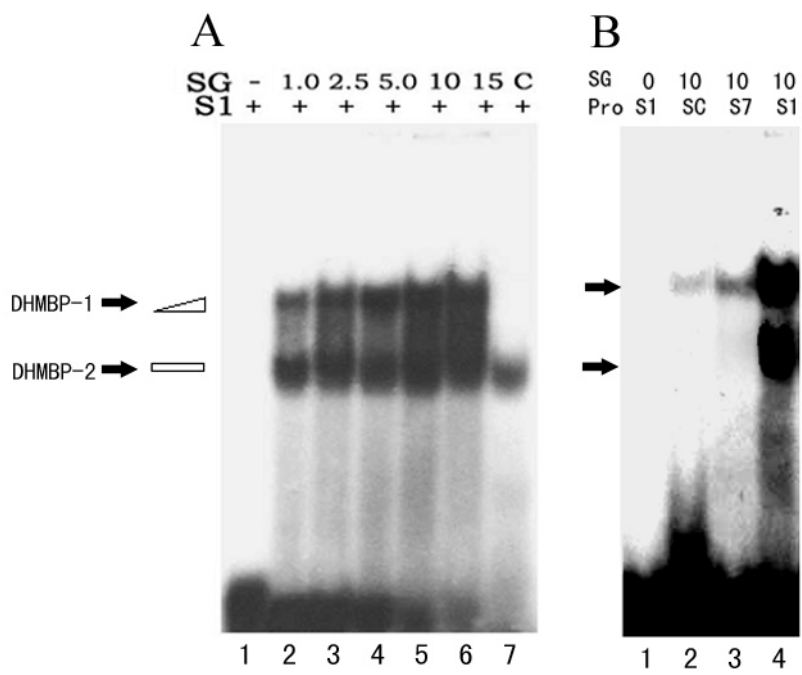

**Figure 3**
